# Supplementary material
Source: HighWire-hosted journal article supplement (https://bmjopen.bmj.com/content/9/3/e025666)
Supplement: inline-supplementary-material-1 [file inline-supplementary-material-1.pdf]

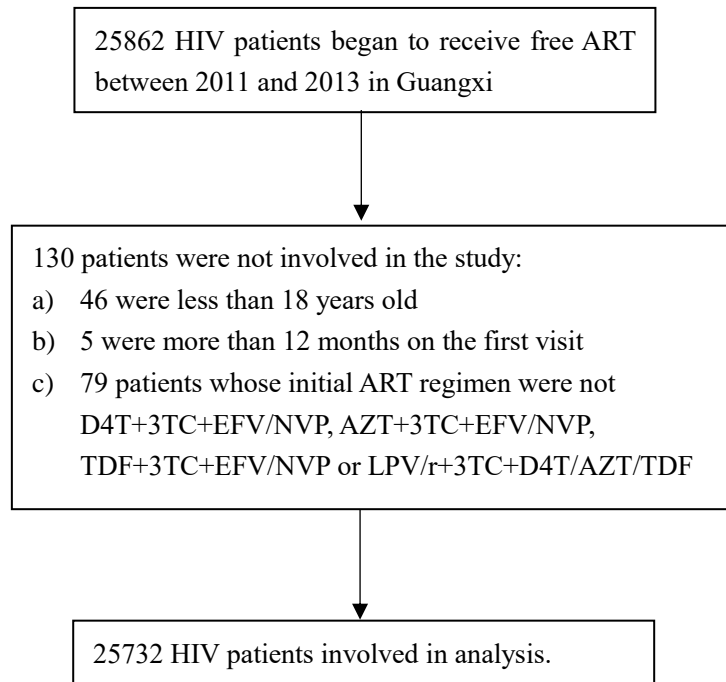

Supplementary figure 1. Flow chart of exclusion in this observational cohort study.

Supplementary table 1. Mortality rates among HIV patients who initiated ART between 2011 and 2013 in Guangxi, China, by year post-ART initiation

| Variable                 | Number of HIV patients | Deaths | Person years | Deaths/100 person years (95% CI) |
|--------------------------|------------------------|--------|--------------|----------------------------------|
| Overall                  | 25732                  | 2062   | 78137.47     | 2.64(2.53-2.75)                  |
| Year post-ART initiation |                        |        |              |                                  |
| First year               | 25732                  | 1164   | 23746.03     | 4.90(4.62-5.18)                  |
| Second year              | 22012                  | 427    | 21711.84     | 1.97(1.78-2.15)                  |
| Third year               | 20852                  | 273    | 18183.13     | 1.50(1.32-1.68)                  |
| Fourth year              | 13867                  | 153    | 10697.61     | 1.43(1.20-1.66)                  |
| Fifth year               | 6505                   | 45     | 3714.04      | 1.21(0.86-1.57)                  |

Supplementary table 2. Attrition rates among HIV patients who initiated ART between 2011 and 2013 in Guangxi, China, by year post-ART initiation

| Variable                 | Number of HIV patients | Attritions | Person years | Attritions /100 person year (95% CI) |
|--------------------------|------------------------|------------|--------------|--------------------------------------|
| Overall                  | 25732                  | 3893       | 78137.47     | 4.98(4.83-5.15)                      |
| Year post-ART initiation |                        |            |              |                                      |
| First year               | 25732                  | 3105       | 23746.03     | 13.08(12.62-13.54)                   |
| Second year              | 22012                  | 1136       | 21711.84     | 5.23(4.93-5.54)                      |
| Third year               | 20852                  | 727        | 18183.13     | 4.00(3.71-4.29)                      |
| Fourth year              | 13867                  | 342        | 10697.61     | 3.20(2.86-3.54)                      |
| Fifth year               | 6505                   | 124        | 3714.04      | 3.34(2.75-3.93)                      |

Supplementary table 3. Death + drop-out rates among HIV patients who initiated ART between 2011 and 2013 in Guangxi, China, by year post-ART initiation

| Variable                 | Number of HIV patients | Deaths + drop-out | Person years | Deaths + drop-out /100 person years (95% CI) |
|--------------------------|------------------------|-------------------|--------------|----------------------------------------------|
| Overall                  | 25732                  | 5955              | 78137.47     | 7.62(7.43-7.81)                              |
| Year post-ART initiation |                        |                   |              |                                              |
| First year               | 25732                  | 4269              | 23746.03     | 17.98(17.44-18.52)                           |
| Second year              | 22012                  | 1563              | 21711.84     | 7.20(6.84-7.56)                              |
| Third year               | 20852                  | 1000              | 18183.13     | 5.50(5.16-5.84)                              |
| Fourth year              | 13867                  | 495               | 10697.61     | 4.63(4.22-5.03)                              |
| Fifth year               | 6505                   | 169               | 3714.04      | 4.55(3.86-5.24)                              |

Supplementary table 4. Effects of initial ART regimen on death + drop-out in HIV-infected patients who started ART between 2011 and 2013 in Guangxi, China

| Variable            | Number | Deaths+ drop-out | Person years | Deaths + drop-out /100 person years (95% CI) | AHR* (95%CI)    | P-value | AHR* (95%CI)    | P-value |
|---------------------|--------|------------------|--------------|----------------------------------------------|-----------------|---------|-----------------|---------|
| Total               | 25732  | 5955             | 78137.47     | 7.62(7.43-7.81)                              |                 |         |                 |         |
| Initial ART regimen |        |                  |              |                                              |                 |         |                 |         |
| D4T-based regimen   | 5483   | 1531             | 17384.21     | 8.81(8.37-9.25)                              | Reference       |         |                 |         |
| AZT-based regimen   | 12018  | 2385             | 38705.61     | 6.16(5.91-6.41)                              | 0.79(0.74-0.85) | <0.001  | Reference       |         |
| TDF-based regimen   | 5352   | 1109             | 14315.82     | 7.75(7.29-8.20)                              | 0.85(0.78-0.92) | <0.001  | 1.07(1.00-1.15) | 0.06    |
| LPV/r-based regimen | 2879   | 930              | 7731.82      | 12.03(11.26-12.80)                           | 1.32(1.22-1.44) | <0.001  | 1.67(1.54-1.81) | <0.001  |

\* AHR=adjusted hazard ratio; covariates of the adjusted model included: age, sex, marital status, route of HIV infection, CD4 count before ART, WHO clinic stage before ART.

Supplementary table 5. Effects of initial ART regimen on death in HIV-infected patients who started ART between 2011 and 2013 in Guangxi, China

| Variable            | Number | Deaths | Person years | Deaths /100 person years (95% CI) | AHR* (95%CI)    | P-value | AHR* (95%CI)    | P-value |
|---------------------|--------|--------|--------------|-----------------------------------|-----------------|---------|-----------------|---------|
| Total               | 25732  | 2062   | 78137.47     | 2.64(2.53-2.75)                   |                 |         |                 |         |
| Initial ART regimen |        |        |              |                                   |                 |         |                 |         |
| NNRTI-based regimen | 22853  | 1739   | 70405.65     | 2.47(2.35-2.59)                   | Reference       |         |                 |         |
| PI-based regimen    | 2879   | 323    | 7731.82      | 4.18(3.72-4.63)                   | 1.51(1.33-1.71) | <0.001  |                 |         |
| NNRTI-based regimen |        |        |              |                                   |                 |         |                 |         |
| D4T-based regimen   | 5483   | 656    | 17384.21     | 3.77(3.48-4.06)                   | Reference       |         |                 |         |
| AZT-based regimen   | 12018  | 695    | 38705.61     | 1.80(1.66-1.93)                   | 0.64(0.57-0.71) | <0.001  | Reference       |         |
| TDF-based regimen   | 5352   | 388    | 14315.82     | 2.71(2.44-2.98)                   | 0.79(0.70-0.90) | <0.001  | 1.24(1.09-1.41) | <0.001  |
| PI-based regimen    |        |        |              |                                   |                 |         |                 |         |
| LPV/r+3TC+D4T       | 280    | 45     | 717.04       | 6.28(4.44-8.11)                   | Reference       |         |                 |         |
| LPV/r+3TC+AZT       | 863    | 39     | 2471.79      | 1.58(1.08-2.07)                   | 0.62(0.40-0.97) | 0.03    | Reference       |         |
| LPV/r+3TC+TDF       | 1736   | 239    | 4542.99      | 5.26(4.59-5.93)                   | 0.96(0.70-1.32) | 0.81    | 1.54(1.09-2.48) | 0.01    |

\* AHR=adjusted hazard ratio; covariates of the adjusted model included: age, sex, marital status, route of HIV infection, CD4 count before ART, WHO clinic stage before ART.

Supplementary table 6. Effects of initial ART regimen on drop-out in HIV-infected patients who started ART between 2011 and 2013 in Guangxi, China

| Variable            | Number | Drop-out | Person years | Drop-out /100 person years (95% CI) | AHR* (95%CI)    | P-value | AHR* (95%CI) | P-value |
|---------------------|--------|----------|--------------|-------------------------------------|-----------------|---------|--------------|---------|
| Total               | 25732  | 3893     | 78137.47     | 4.98(4.83-5.14)                     |                 |         |              |         |
| Initial ART regimen |        |          |              |                                     |                 |         |              |         |
| NNRTI-based regimen | 22853  | 3286     | 70405.65     | 4.67(4.51-4.83)                     | Reference       |         |              |         |
| PI-based regimen    | 2879   | 607      | 7731.82      | 7.85(7.23-8.48)                     | 1.55(1.42-1.70) | <0.001  |              |         |
| NNRTI-based regimen |        |          |              |                                     |                 |         |              |         |
| D4T-based regimen   | 5483   | 875      | 17384.21     | 5.03(4.70-5.37)                     | Reference       |         |              |         |
| AZT-based regimen   | 12018  | 1690     | 38705.61     | 4.37(4.16-4.57)                     | 0.88(0.80-0.95) | <0.001  | Reference    |         |

|                   |      |     |          |                  |                 |        |                 |       |
|-------------------|------|-----|----------|------------------|-----------------|--------|-----------------|-------|
| TDF-based regimen | 5352 | 721 | 14315.82 | 5.04(4.67-5.40)  | 0.88(0.79-0.97) | <0.001 | 1.00(1.05-1.24) | 0.002 |
| PI-based regimen  |      |     |          |                  |                 |        |                 |       |
| LPV/r+3TC+D4T     | 280  | 71  | 717.04   | 9.90(7.60-12.21) | Reference       |        |                 |       |
| LPV/r+3TC+AZT     | 863  | 163 | 2471.79  | 6.59(5.58-7.61)  | 1.00(0.74-1.33) | 0.97   | Reference       |       |
| LPV/r+3TC+TDF     | 1736 | 373 | 4542.99  | 8.21(7.38-9.04)  | 0.85(0.66-1.09) | 0.20   | 1.00(0.92-1.09) | 0.99  |

\* AHR=adjusted hazard ratio; covariates of the adjusted model included: age, sex, marital status, route of HIV infection, CD4 count before ART, WHO clinic stage before ART.

Supplementary table 7. Effects of initial ART regimen on death and drop-out in HIV-infected patients who started ART between 2011 and 2013 in Guangxi, China

| Variable            | Number | Deaths + drop-out | Person years | Deaths + drop-out /100 person years (95% CI) | AHR* (95%CI)    | P-value | AHR* (95%CI)    | P-value |
|---------------------|--------|-------------------|--------------|----------------------------------------------|-----------------|---------|-----------------|---------|
| Total               | 25732  | 5955              | 78137.47     | 7.62(7.43-7.81)                              |                 |         |                 |         |
| Initial ART regimen |        |                   |              |                                              |                 |         |                 |         |
| NNRTI-based regimen | 22853  | 5025              | 70405.65     | 7.14(6.94-7.33)                              | Reference       |         |                 |         |
| PI-based regimen    | 2879   | 930               | 7731.82      | 12.03(11.26-12.80)                           | 1.54(1.44-1.66) | <0.001  |                 |         |
| NNRTI-based regimen |        |                   |              |                                              |                 |         |                 |         |
| D4T-based regimen   | 5483   | 1531              | 17384.21     | 8.81(8.37-9.25)                              | Reference       |         |                 |         |
| AZT-based regimen   | 12018  | 2385              | 38705.61     | 6.16(5.91-6.41)                              | 0.78(0.73-0.83) | <0.001  | Reference       |         |
| TDF-based regimen   | 5352   | 1109              | 14315.82     | 7.75(7.29-8.20)                              | 0.84(0.77-0.91) | <0.001  | 1.07(1.00-1.15) | 0.06    |
| PI-based regimen    |        |                   |              |                                              |                 |         |                 |         |
| LPV/r+3TC+D4T       | 280    | 116               | 717.04       | 16.18(13.23-19.12)                           | Reference       |         |                 |         |
| LPV/r+3TC+AZT       | 863    | 202               | 2471.79      | 8.17(7.05-9.30)                              | 0.89(0.70-1.13) | 0.32    | Reference       |         |
| LPV/r+3TC+TDF       | 1736   | 612               | 4542.99      | 13.47(12.40-14.54)                           | 0.89(0.73-1.09) | 0.25    | 1.00(0.85-1.19) | 0.97    |

\* AHR=adjusted hazard ratio; covariates of the adjusted model included: age, sex, marital status, route of HIV infection, CD4 count before ART, WHO clinic stage before ART.
